# Supplementary material
Source: publisher figshare collection journal article supplement (https://acs.figshare.com/ndownloader/files/21584277)
Supplement: Supplementary file 1 [file 21584277]

# Supporting Information

## In situ Growing Double-layer TiO<sub>2</sub> Nanorod Arrays on New-type FTO Electrode for Low-concentration NH<sub>3</sub> Detection at Room temperature

*Guodong Zhao, Jingyue Xuan, Qianqian Gong, Lili Wang, Juanjuan Ren, Meiling Sun,*

*Fuchao Jia, Guangchao Yin\*, Bo Liu\**

Laboratory of Functional Molecular and Materials, School of physics and optoelectronic engineering, Shandong University of Technology, Zibo 255000, China.

\*Corresponding author.

E-mail address: yingc@sdut.edu.cn (G. C. Yin).

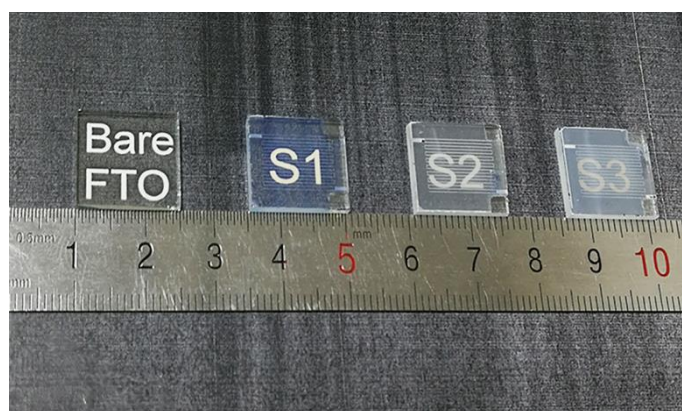

Fig. S1 Real photographs of each fabricated sensors.

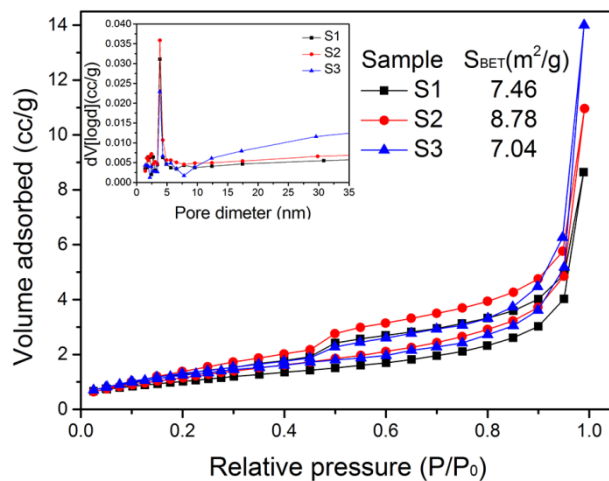

Figure S2. N<sub>2</sub> adsorption-desorption isotherms and pore size distribution curves (inset) of S1, S2 and S3.

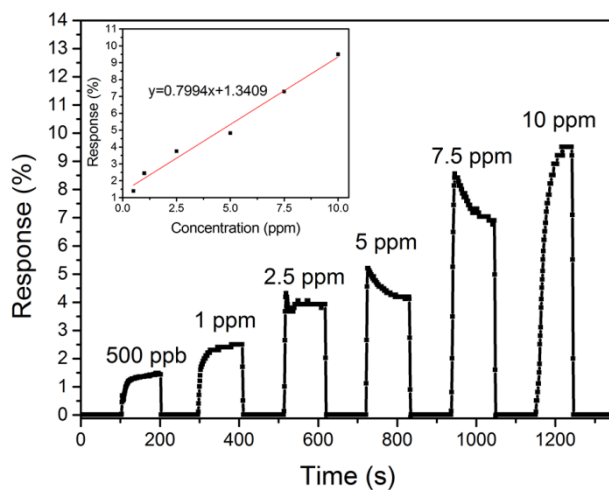

Fig. S3. The gas sensing curve of S2 to different-concentration NH<sub>3</sub> from 0.5 to 10 ppm in 50% RH air at room temperature. The insets is the concentration vs response curve.

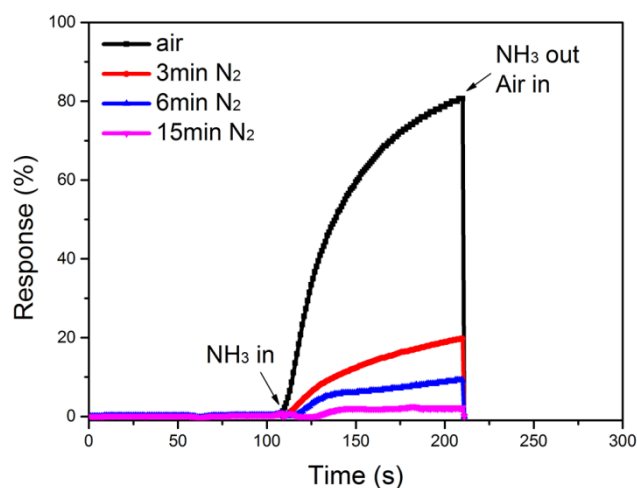

Fig. S4 Sensing curve of TiO<sub>2</sub> NRs for 100 ppm NH<sub>3</sub> under different N<sub>2</sub> flushing times at room temperature.

Herein, we control the time of N<sub>2</sub> flushing to reduce the oxygen concentration of the ambient gas, so as to qualitatively study the effect of oxygen concentration on NH<sub>3</sub> sensing. Since we use a static gas distribution system and the background gas in the recovery phase changes from N<sub>2</sub>/air mixture to air, the response characteristics of the sensor will not be discussed here.
